# Supplementary material for: Inflammation Fuels Colicin Ib-Dependent Competition of Salmonella Serovar Typhimurium and E. coli in Enterobacterial Blooms
Source: PubMed Central journal article supplement (PMC3879352; doi:10.1371/journal.ppat.1003844), 2014-01-02

# Nedialkova, Denzler et al., Figure S2

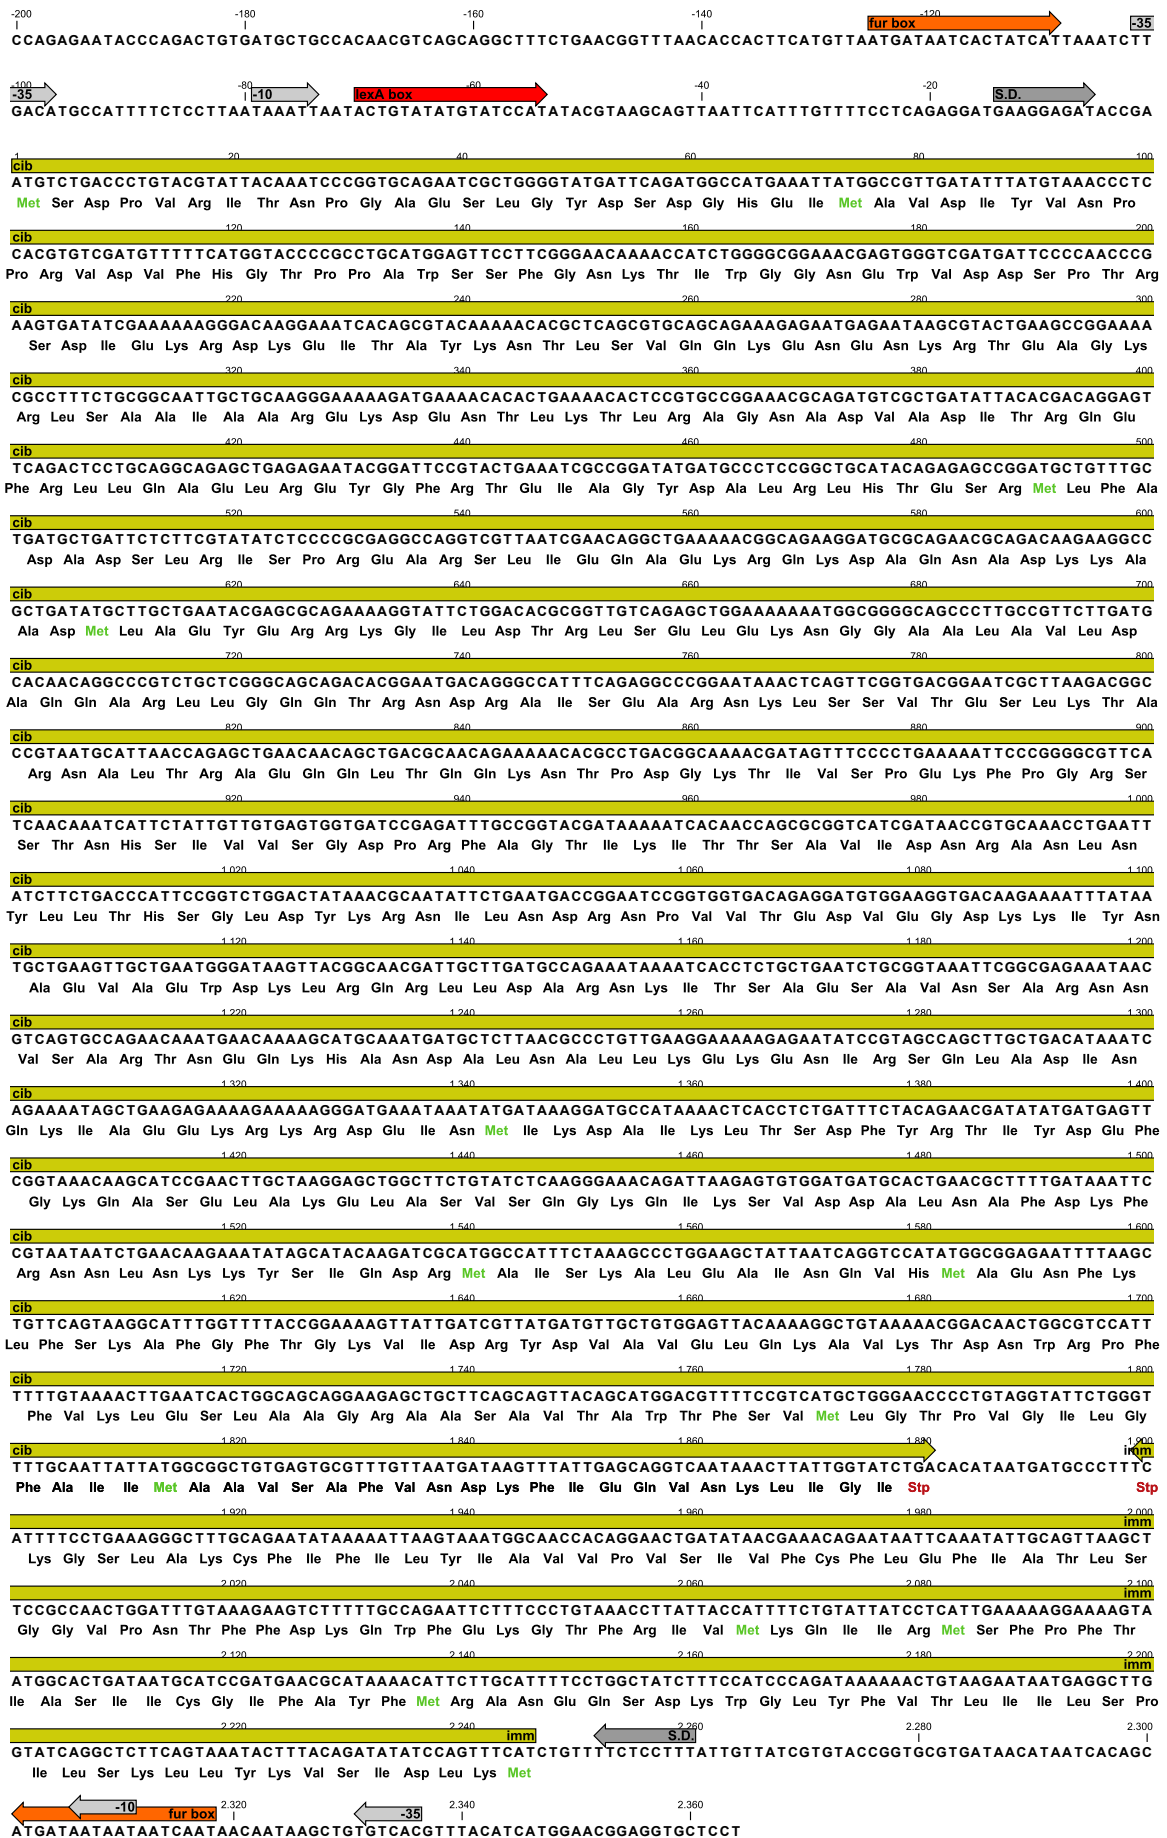

Supplement: ppat.1003844.s002.pdf [file ppat.1003844.s002.pdf]
